# Supplementary material for: Development of Pleiotropic TrkB and 5-HT4 Receptor Ligands as Neuroprotective Agents
Source: MDPI journal article supplement (doi:10.3390/molecules29020515), 2024-01-19

## Supplementary Materials

# Development of Pleiotropic TrkB and 5-HT<sub>4</sub> Receptor Ligands as Neuroprotective Agents

Mirjana Antonijevic <sup>1,†</sup>, Despoina Charou <sup>2,3,†</sup>, Audrey Davis <sup>1</sup>, Thomas Curel <sup>4</sup>, Maria Valcarcel <sup>5</sup>, Isbaal Ramos <sup>5</sup>, Patricia Villacé <sup>5</sup>, Sylvie Claeysen <sup>4</sup>, Patrick Dallemagne <sup>1</sup>, Achille Gravanis <sup>2,3</sup>, Ioannis Charalampopoulos <sup>2,3</sup> and Christophe Rochais <sup>1,\*</sup>

<sup>1</sup> Normandie University, Unicaen, Centre d'Etudes et de Recherche sur le Médicament de Normandie (CERMN), 14000 Caen, France; mirjana.antonijevic@unicaen.fr (M.A.); audrey.davis@unicaen.fr (A.D.); patrick.dallemagne@unicaen.fr (P.D.)

<sup>2</sup> Department of Pharmacology, Medical School, University of Crete, 70013, Heraklion, Greece; dcharou@gmail.com (D.C.); gravanis@med.uoc.gr (A.G.); charalampn@uoc.gr (I.C.)

<sup>3</sup> Institute of Molecular Biology & Biotechnology, Foundation of Research & Technology-Hellas, 70013 Heraklion, Greece

<sup>4</sup> IGF, Univ Montpellier, CNRS, INSERM, 34000 Montpellier, France; thomas.curel@igf.cnrs.fr (T.C.); sylvie.claeyesen@igf.cnrs.fr (S.C.)

<sup>5</sup> Innoprot S.L, Derio, 48160 Bizkaia, Spain; mvalcarcel@innoprot.com (M.V.); iramos@zabala.es (I.R.); pvillace@innoprot.com (P.V.)

\* Correspondence: christophe.rochais@unicaen.fr; Tel.: +33-2-31-56-68-13

<sup>†</sup> These authors contributed equally to this work.

## Contents

|                                                                                      |    |
|--------------------------------------------------------------------------------------|----|
| Analytical spectrum of compounds 7 – 19.....                                         | 2  |
| Full images of Western blot of phosphorylation assay of NIH-3T3 TrkB cell line ..... | 15 |
| Determination of cAMP production .....                                               | 19 |

## Analytical spectrum of compounds 7 – 19

**1,3-dimethyl-5-[(2-{4-[3-(4-amino-5-chloro-2-methoxyphenyl)-3-oxopropyl]piperidin-1-yl}ethyl)carbamoyl]benzene-1,3-dicarboxylate carbamate (7)**

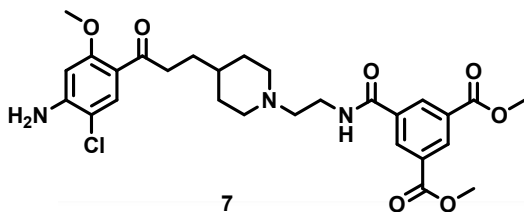

### Elemental Composition Report

Page 6

#### Single Mass Analysis

Tolerance = 5.0 PPM / DBE: min = -1.5, max = 50.0

Element prediction: Off

Number of isotope peaks used for i-FIT = 3

Monoisotopic Mass, Even Electron Ions

13720 formula(e) evaluated with 1 results within limits (up to 50 best isotopic matches for each mass)

Elements Used:

C: 28-28 H: 35-35 B: 0-1 N: 0-200 O: 0-200 Na: 0-1 Cl: 0-8

MAC042 187 (1.710) Cm (180:216)

1: TOF MS ES+

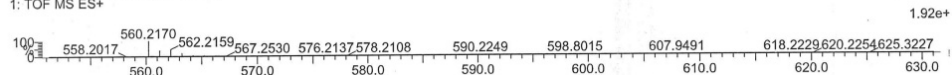

Minimum: -1.5  
Maximum: 5.0 5.0 50.0

| Mass     | Calc. Mass | mDa | PPM | DBE  | i-FIT  | Norm | Conf(%) | Formula                                                          |
|----------|------------|-----|-----|------|--------|------|---------|------------------------------------------------------------------|
| 560.2170 | 560.2164   | 0.6 | 1.1 | 12.5 | 1604.2 | n/a  | n/a     | C <sub>28</sub> H <sub>35</sub> N <sub>3</sub> O <sub>7</sub> Cl |

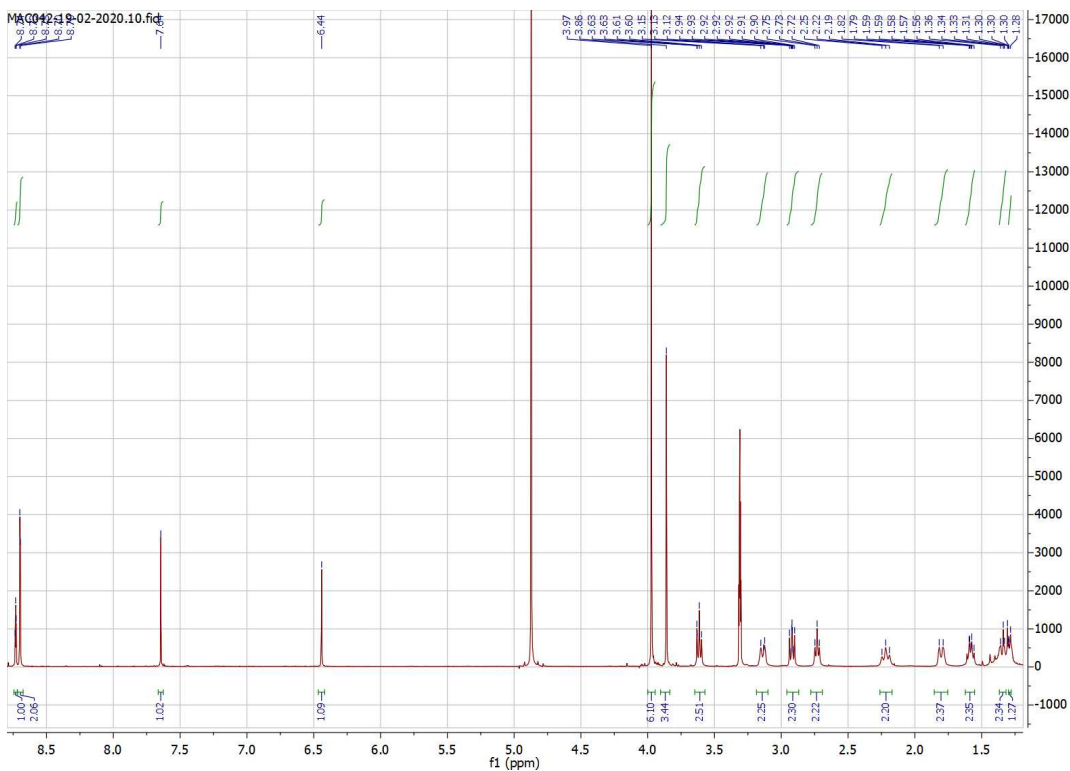

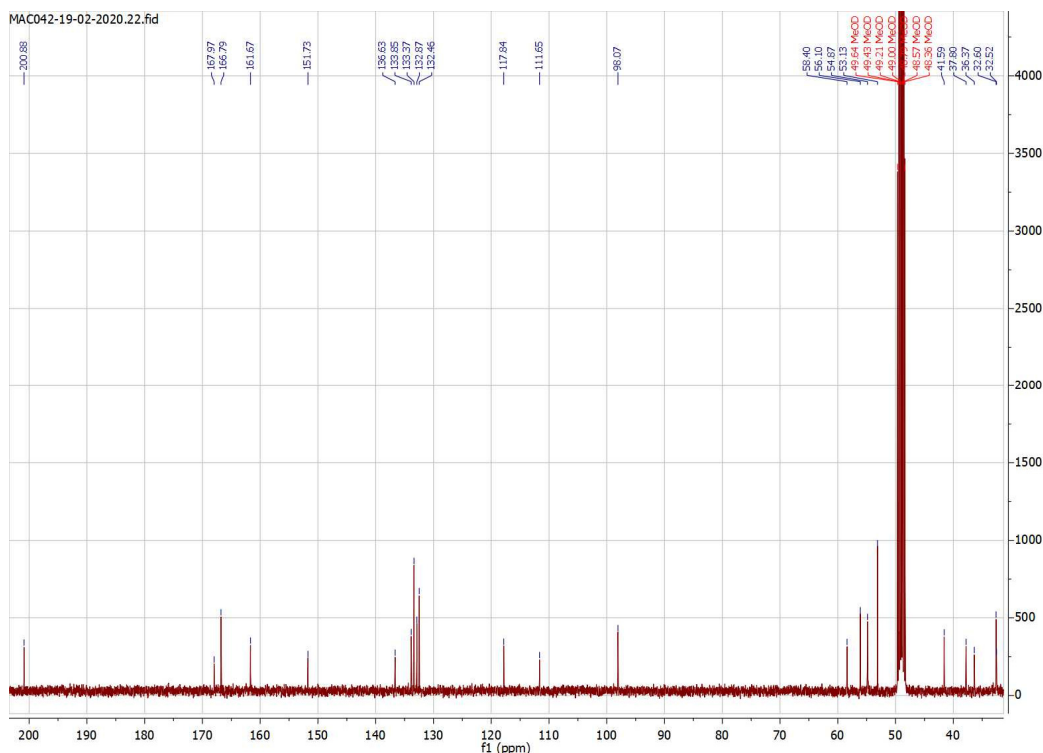

*N*<sup>1</sup>-(2-{4-[3-(4-amino-5-chloro-2-methoxyphenyl)-3-oxopropyl]piperidin-1-yl}ethyl)-*N*<sup>3</sup>,*N*<sup>5</sup>-bis(2-hydroxyethyl)benzene-1,3,5-tricarboxamide (**8**)

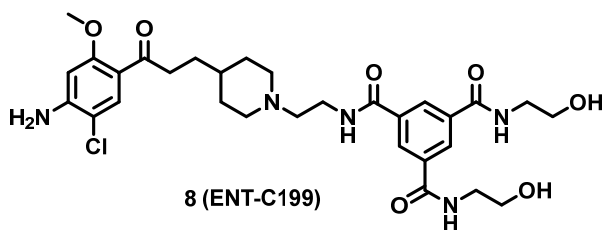

## Elemental Composition Report

Page 1

### Single Mass Analysis

Tolerance = 5.0 PPM / DBE: min = -1.5, max = 50.0

Element prediction: Off

Number of isotope peaks used for i-FIT = 5

Monoisotopic Mass, Even Electron Ions

150 formula(e) evaluated with 1 results within limits (up to 50 best isotopic matches for each mass)

Elements Used:

C: 0-30 H: 0-1000 N: 0-6 O: 0-8 35Cl: 0-1

CERMN\_MAC\_D43 145 (1.364) Cm (144:145-(135:139+203:210))

1: TOF MS ES<sup>+</sup>

1.79e+004

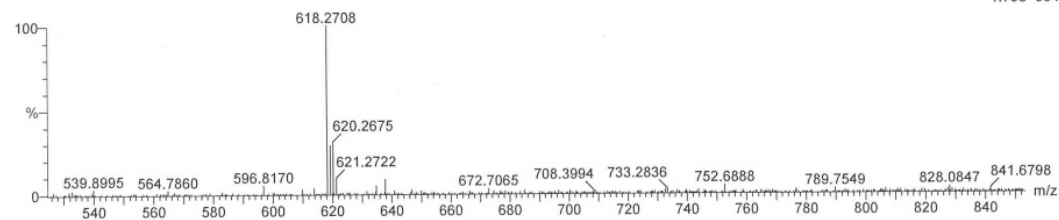

Minimum: -1.5  
Maximum: 50.0

| Mass     | Calc. Mass | mDa | PPM | DBE  | i-FIT | Norm | Conf(%) | Formula            |
|----------|------------|-----|-----|------|-------|------|---------|--------------------|
| 618.2708 | 618.2695   | 1.3 | 2.1 | 12.5 | 72.1  | n/a  | n/a     | C30 H41 N5 O7 35Cl |

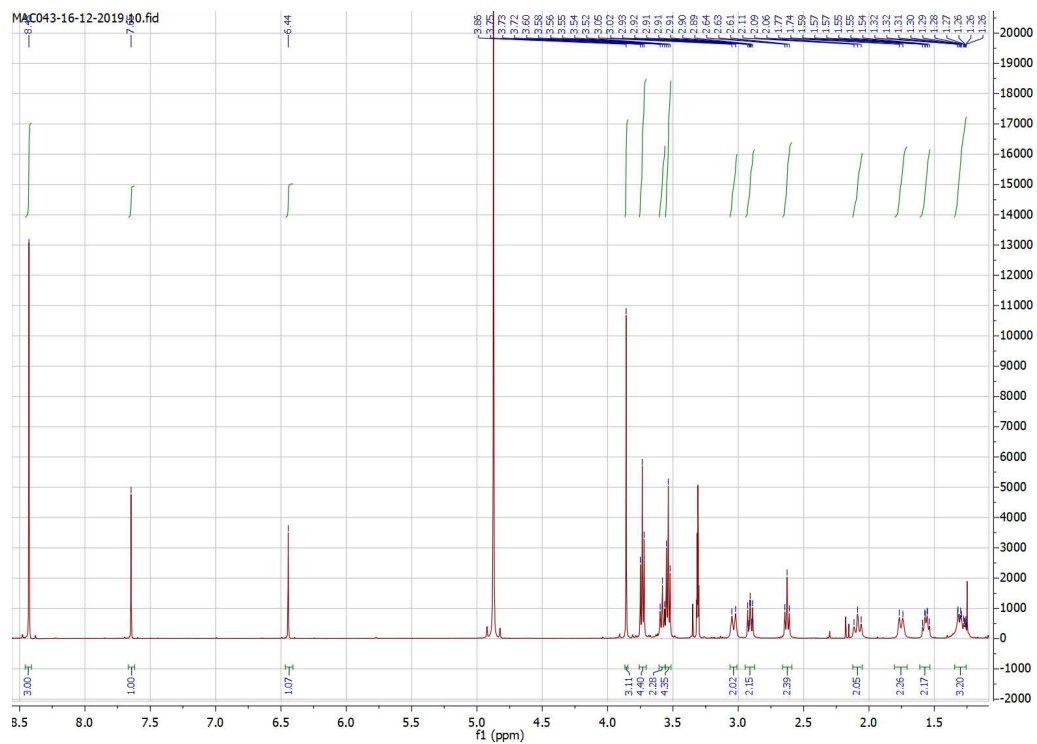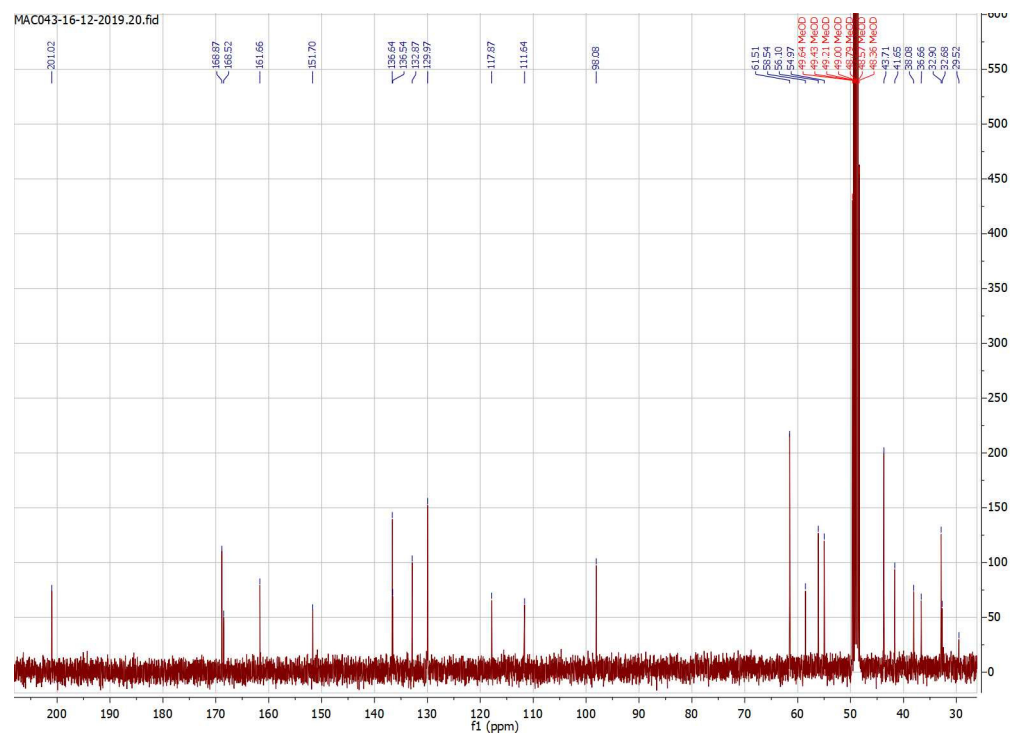



*Tert-butyl-(3-(4-(3-(4-amino-5-chloro-2-methoxyphenyl)-3-oxopropyl)piperidin-1-yl)propyl)carbamate*  
(11)

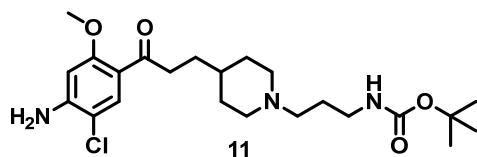

**Elemental Composition Report**

Page 1

**Single Mass Analysis**

Tolerance = 5.0 PPM / DBE: min = -1.5, max = 50.0

Element prediction: Off

Number of isotope peaks used for i-FIT = 3

Monoisotopic Mass, Even Electron Ions

323 formula(e) evaluated with 1 results within limits (up to 50 closest results for each mass)

Elements Used:

C: 0-31 H: 0-100 N: 0-4 O: 0-6 Cl: 0-1

MAC076 181 (1.698) Cm (181:186)

1: TOF MS ES+

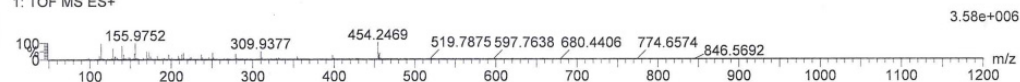

Minimum: -1.5  
Maximum: 5.0 5.0 50.0

| Mass     | Calc. Mass | mDa  | PPM  | DBE | i-FIT  | Norm | Conf(%) | Formula          |
|----------|------------|------|------|-----|--------|------|---------|------------------|
| 454.2469 | 454.2473   | -0.4 | -0.9 | 6.5 | 1716.8 | n/a  | n/a     | C23 H37 N3 O4 Cl |

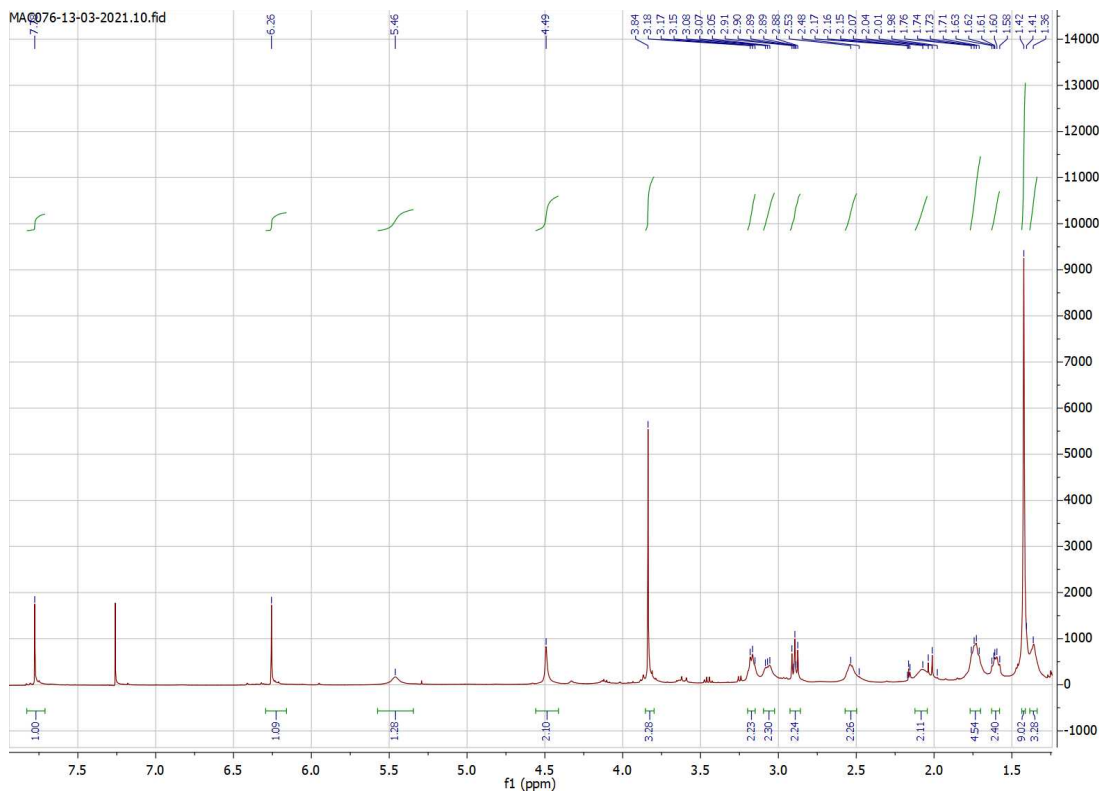

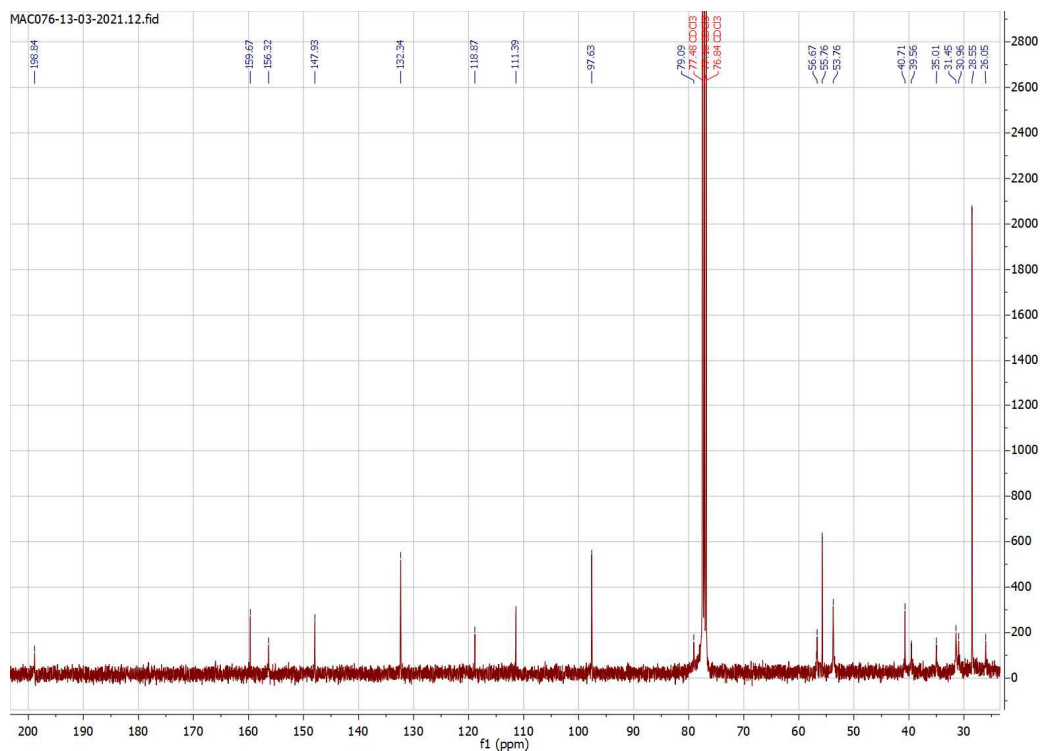

1,3-dimethyl-5-[(2-{4-[3-(4-amino-5-chloro-2-methoxyphenyl)-3-oxopropyl]piperidin-1-yl}propyl)carbamoyl]benzene-1,3-dicarboxylate (12)

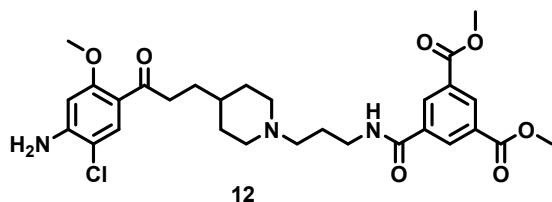

## Elemental Composition Report

Page 1

### Single Mass Analysis

Tolerance = 5.0 PPM / DBE: min = -1.5, max = 50.0

Element prediction: Off

Number of isotope peaks used for i-FIT = 3

Monoisotopic Mass, Even Electron Ions

123 formula(e) evaluated with 1 results within limits (up to 50 closest results for each mass)

Elements Used:

C: 0-31 H: 0-100 N: 0-4 O: 0-7 Cl: 0-1

MAC078 230 (2.146) Cm (230:237)

1: TOF MS ES+

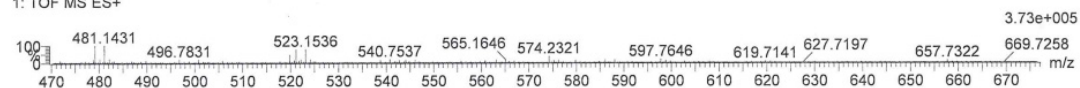

Minimum: -1.5  
Maximum: 5.0 5.0 50.0

| Mass     | Calc. Mass | mDa | PPM | DBE  | i-FIT  | Norm | Conf(%) | Formula          |
|----------|------------|-----|-----|------|--------|------|---------|------------------|
| 574.2321 | 574.2320   | 0.1 | 0.2 | 12.5 | 1562.9 | n/a  | n/a     | C29 H37 N3 O7 Cl |

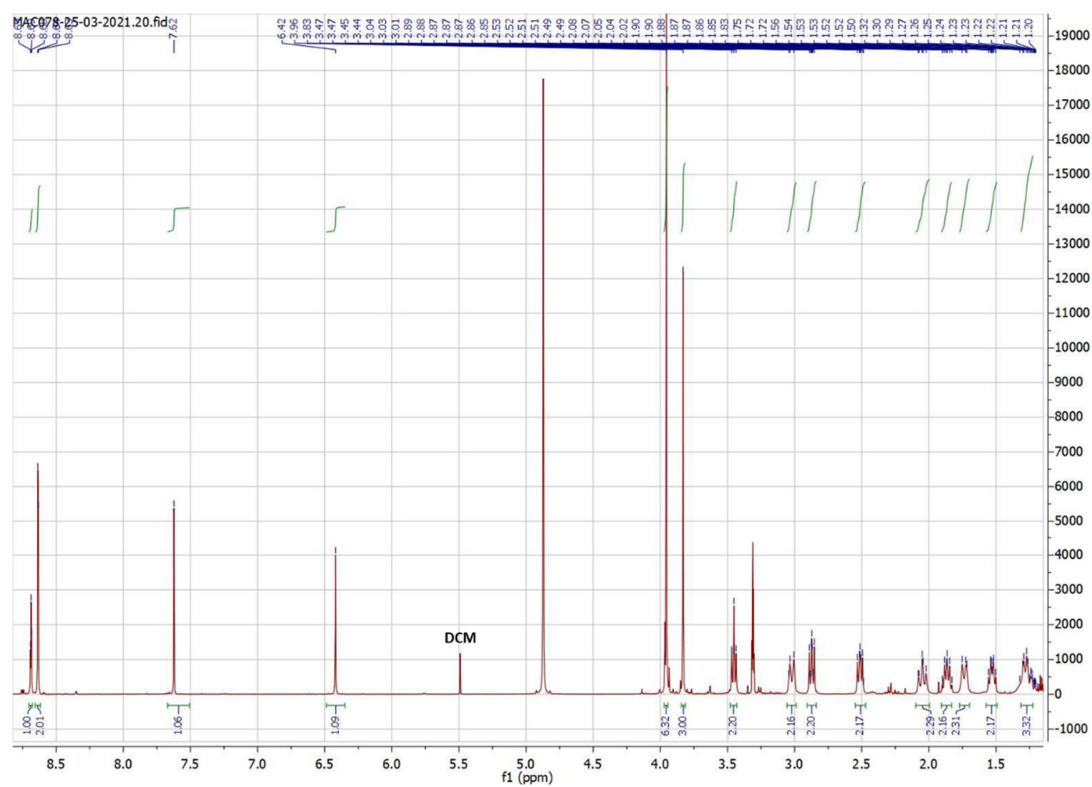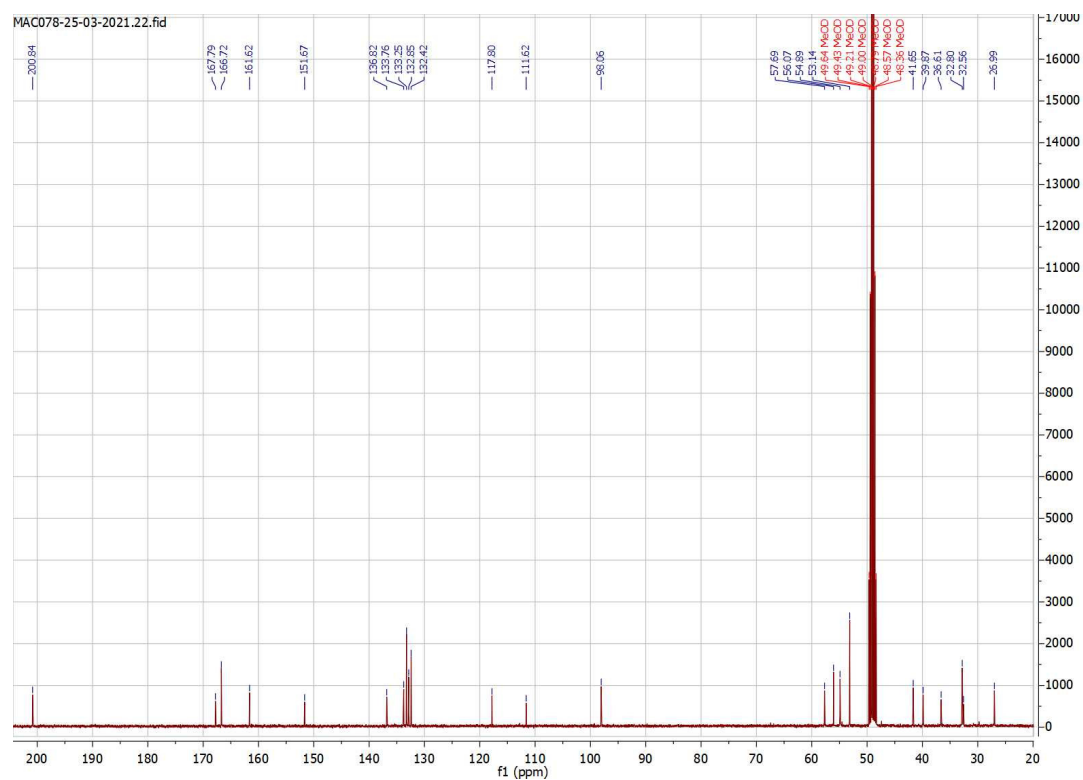

*N*<sup>1</sup>-(3-(4-(3-(4-amino-5-chloro-2-methoxyphenyl)-3-oxopropyl)piperidin-1-yl)propyl)-*N*<sup>3</sup>,*N*<sup>5</sup>-bis(2-hydroxyethyl)benzene-1,3,5-tricarboxamide (13)

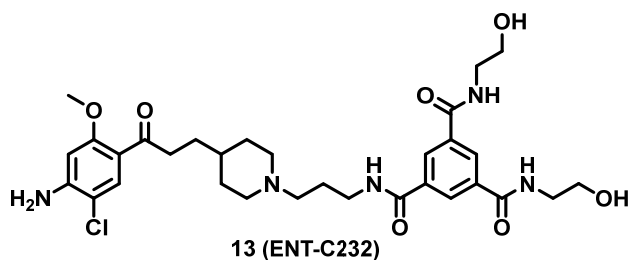

## Elemental Composition Report

Page 1

### Single Mass Analysis

Tolerance = 5.0 PPM / DBE: min = -1.5, max = 50.0

Element prediction: Off

Number of isotope peaks used for i-FIT = 3

Monoisotopic Mass, Even Electron Ions

100 formula(e) evaluated with 1 results within limits (up to 50 closest results for each mass)

Elements Used:

C: 0-31 H: 0-100 N: 0-5 O: 0-7 Cl: 0-1

MAC079 148 (1.391) Cm (145:148)

1: TOF MS ES+

8.62e+006

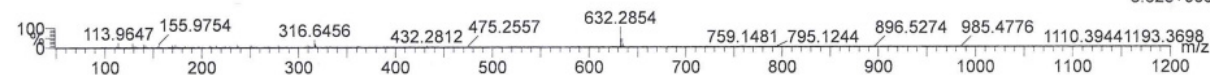

Minimum:

Maximum: 5.0 5.0 -1.5

| Mass     | Calc. Mass | mDa | PPM | DBE  | i-FIT  | Norm | Conf(%) | Formula          |
|----------|------------|-----|-----|------|--------|------|---------|------------------|
| 632.2854 | 632.2851   | 0.3 | 0.5 | 12.5 | 1507.7 | n/a  | n/a     | C31 H43 N5 O7 Cl |

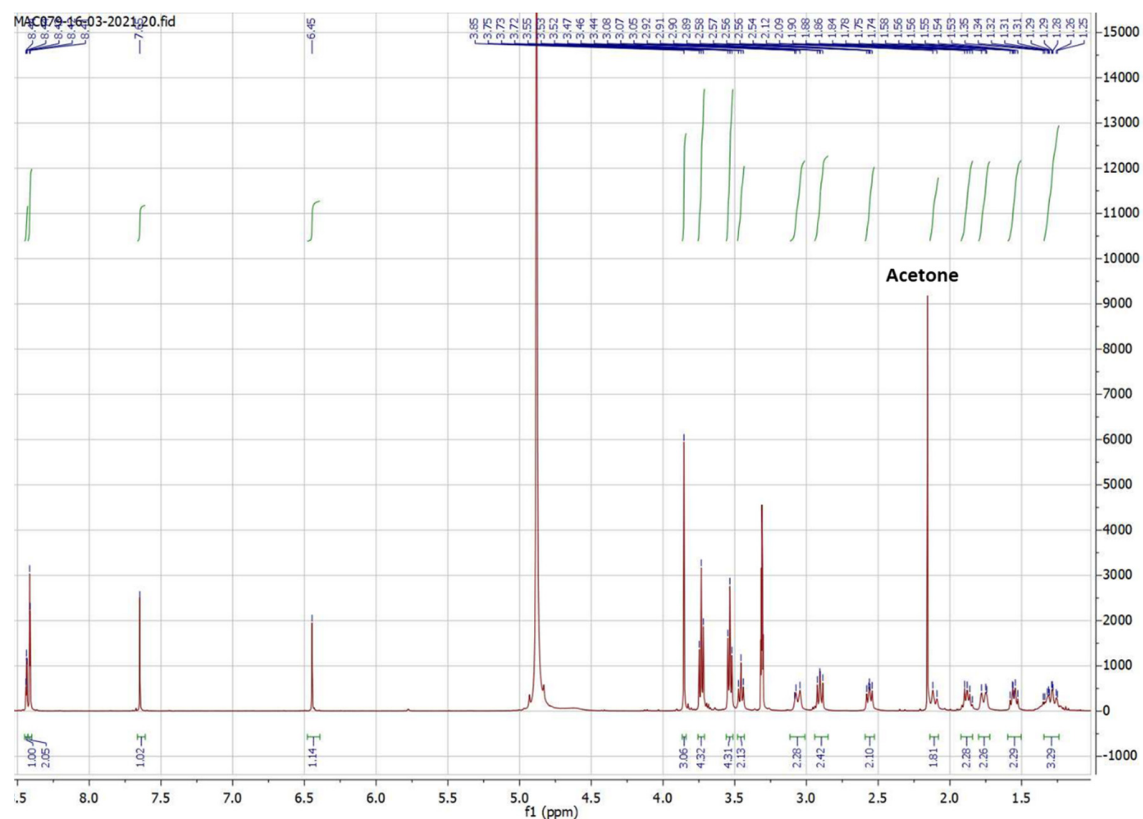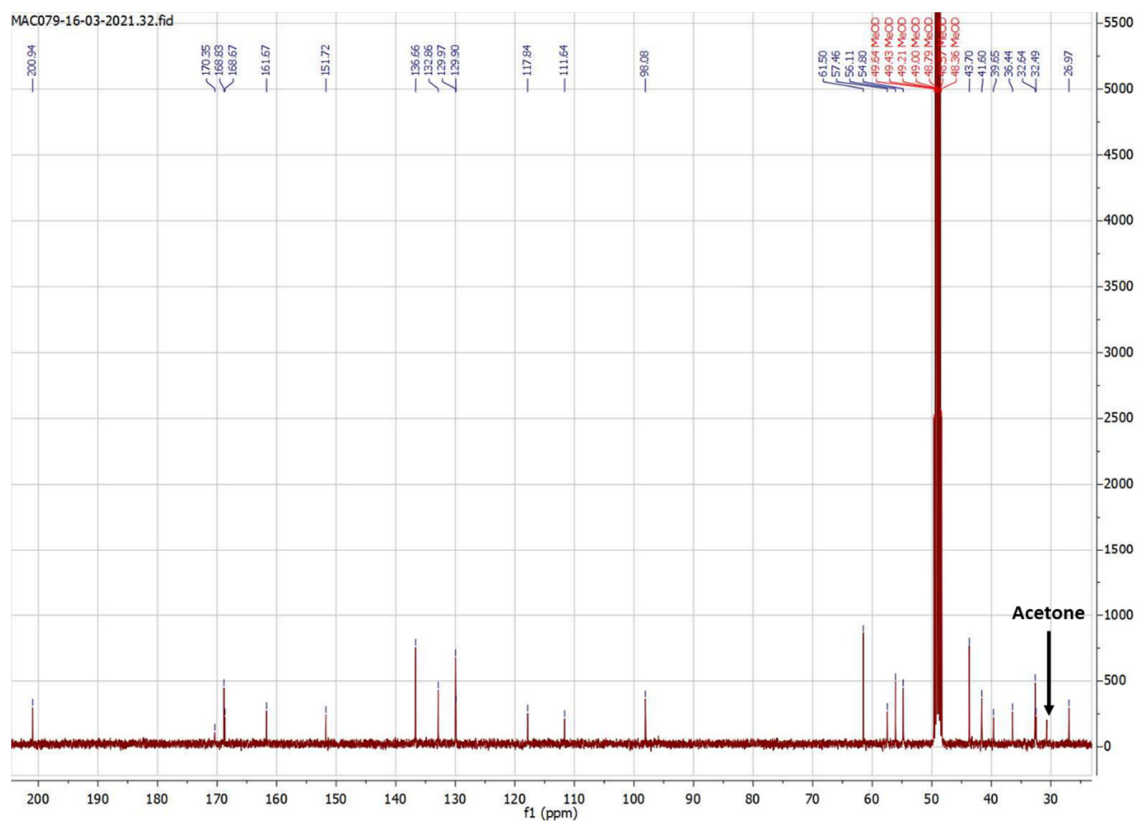

*Tert-butyl-(2-(2-(4-(3-(4-amino-5-chloro-2-methoxyphenyl)-3-oxopropyl)piperidin-1-yl)ethoxy)ethyl)carbamate (17)*

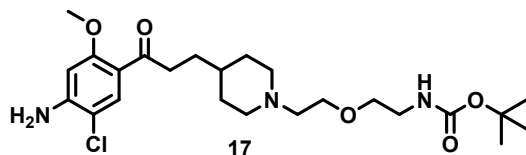

# Elemental Composition Report

Page 1

## Single Mass Analysis

Tolerance = 5.0 PPM / DBE: min = -1.5, max = 50.0

Element prediction: Off

Number of isotope peaks used for i-FIT = 3

Monoisotopic Mass, Even Electron Ions

456 formula(e) evaluated with 1 results within limits (up to 50 closest results for each mass)

Elements Used:

C: 0-24 H: 0-100 N: 0-3 O: 0-5 Na: 0-1 Cl: 0-1 I: 0-1

MAC082 183 (1.715) Cm (183:188)

1: TOF MS ES+

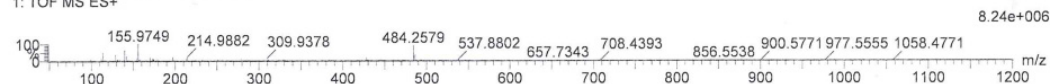

Minimum: -1.5  
Maximum: 5.0 5.0 50.0

| Mass     | Calc. Mass | mDa | PPM | DBE | i-FIT  | Norm | Conf(%) | Formula          |
|----------|------------|-----|-----|-----|--------|------|---------|------------------|
| 484.2579 | 484.2578   | 0.1 | 0.2 | 6.5 | 1974.3 | n/a  | n/a     | C24 H39 N3 O5 Cl |

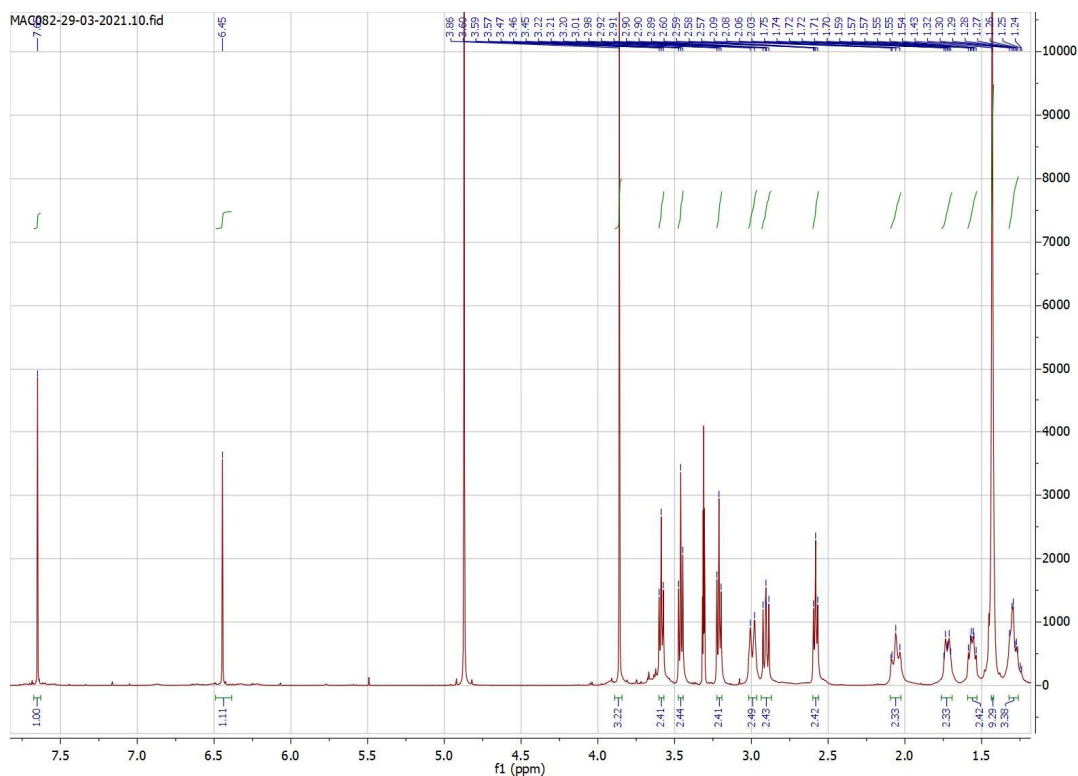

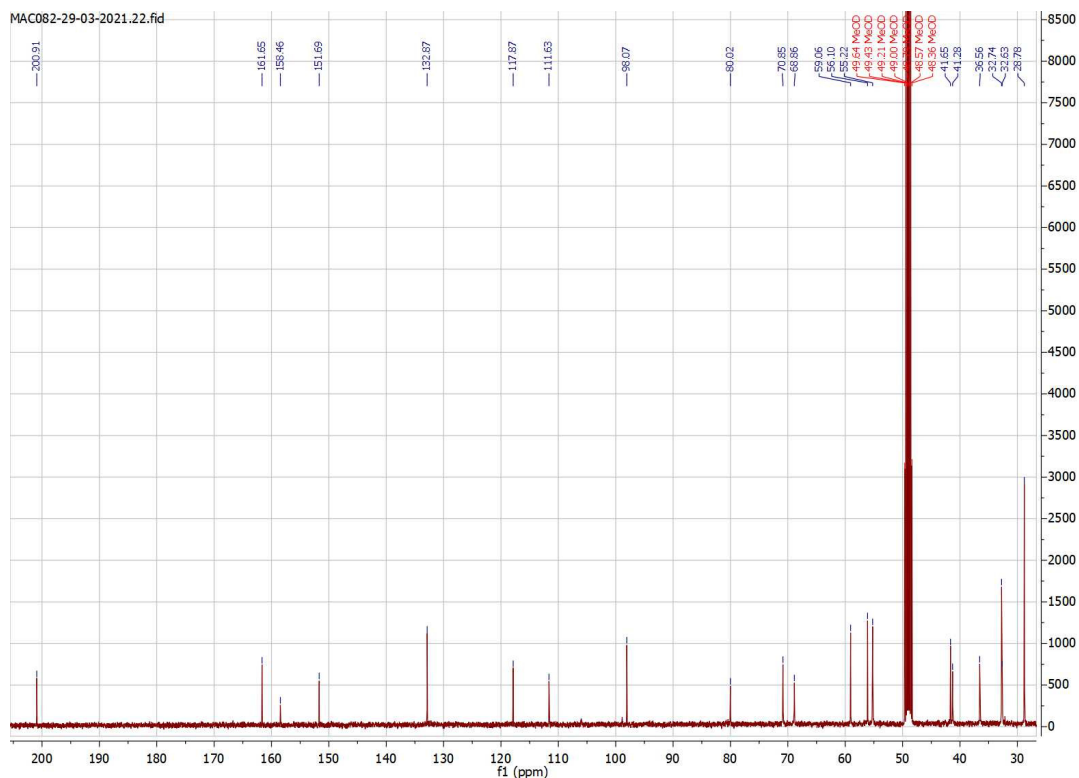

*1,3-dimethyl-5-[(2-{2-[4-[3-(4-amino-5-chloro-2-methoxyphenyl)-3-oxopropyl]piperidin-1-yl}ethoxy)ethyl]carbamoyl]benzene-1,3-dicarboxylate (18)*

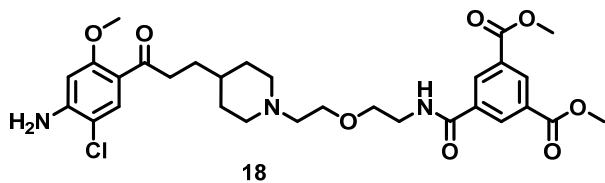

## Elemental Composition Report

Page 1

### Single Mass Analysis

Tolerance = 5.0 PPM / DBE: min = -1.5, max = 50.0

Element prediction: Off

Number of isotope peaks used for i-FIT = 3

Monoisotopic Mass, Even Electron Ions

244 formula(e) evaluated with 1 results within limits (up to 50 closest results for each mass)

Elements Used:

C: 30-30 H: 0-40 N: 0-3 O: 0-8 Na: 0-1 Cl: 0-1 I: 0-1

MAC083 189 (1.768) Cm (189:193)

1: TOF MS ES+

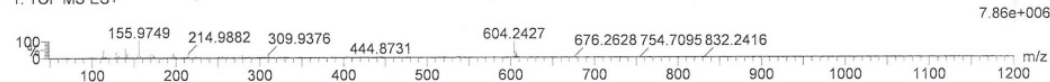

Minimum: -1.5  
Maximum: 5.0 5.0 50.0

| Mass     | Calc. Mass | mDa | PPM | DBE  | i-FIT  | Norm | Conf(%) | Formula          |
|----------|------------|-----|-----|------|--------|------|---------|------------------|
| 604.2427 | 604.2426   | 0.1 | 0.2 | 12.5 | 1739.7 | n/a  | n/a     | C30 H39 N3 O8 Cl |

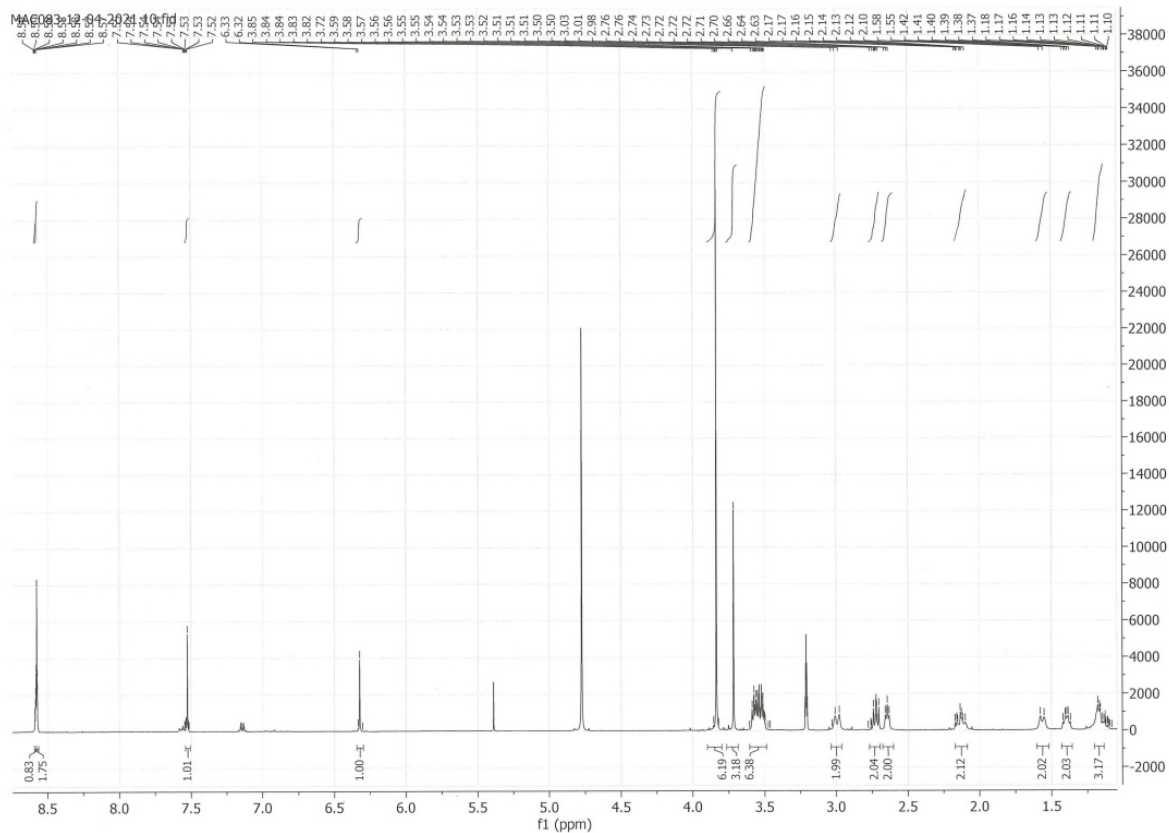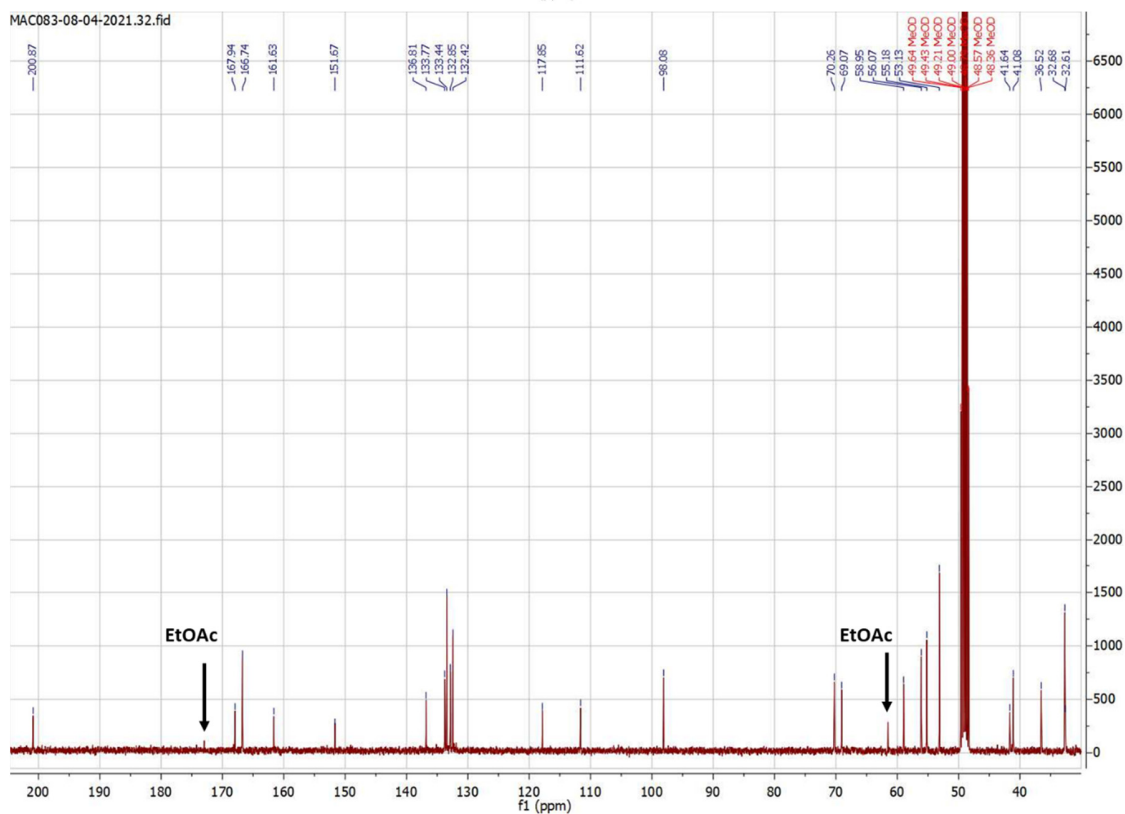



*N*<sup>1</sup>-(2-(2-(4-(3-(4-amino-5-chloro-2-methoxyphenyl)-3-oxopropyl)piperidin-1-yl)ethoxy)ethyl)-*N*<sup>3</sup>,*N*<sup>5</sup>-bis(2-hydroxyethyl)benzene-1,3,5-tricarboxamide (19)

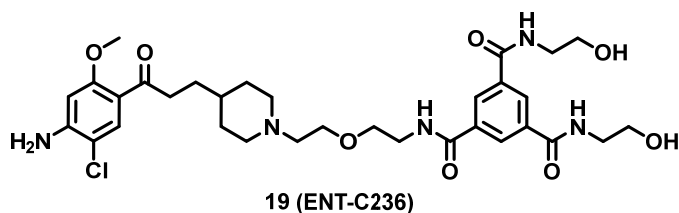

## Elemental Composition Report

Page 1

### Single Mass Analysis

Tolerance = 5.0 PPM / DBE: min = -1.5, max = 50.0

Element prediction: Off

Number of isotope peaks used for i-FIT = 3

Monoisotopic Mass, Even Electron Ions

473 formula(e) evaluated with 1 results within limits (up to 50 closest results for each mass)

Elements Used:

C: 30-32 H: 0-45 N: 0-5 O: 0-8 Na: 0-1 Cl: 0-1 I: 0-1

MAC084 155 (1.452) Cm (155:161)

1: TOF MS ES+

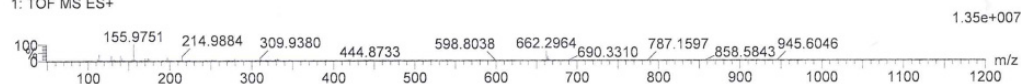

Minimum: -1.5

Maximum: 50.0

| Mass     | Calc. Mass | mDa | PPM | DBE  | i-FIT  | Norm | Conf(%) | Formula          |
|----------|------------|-----|-----|------|--------|------|---------|------------------|
| 662.2964 | 662.2957   | 0.7 | 1.1 | 12.5 | 1891.7 | n/a  | n/a     | C32 H45 N5 O8 Cl |

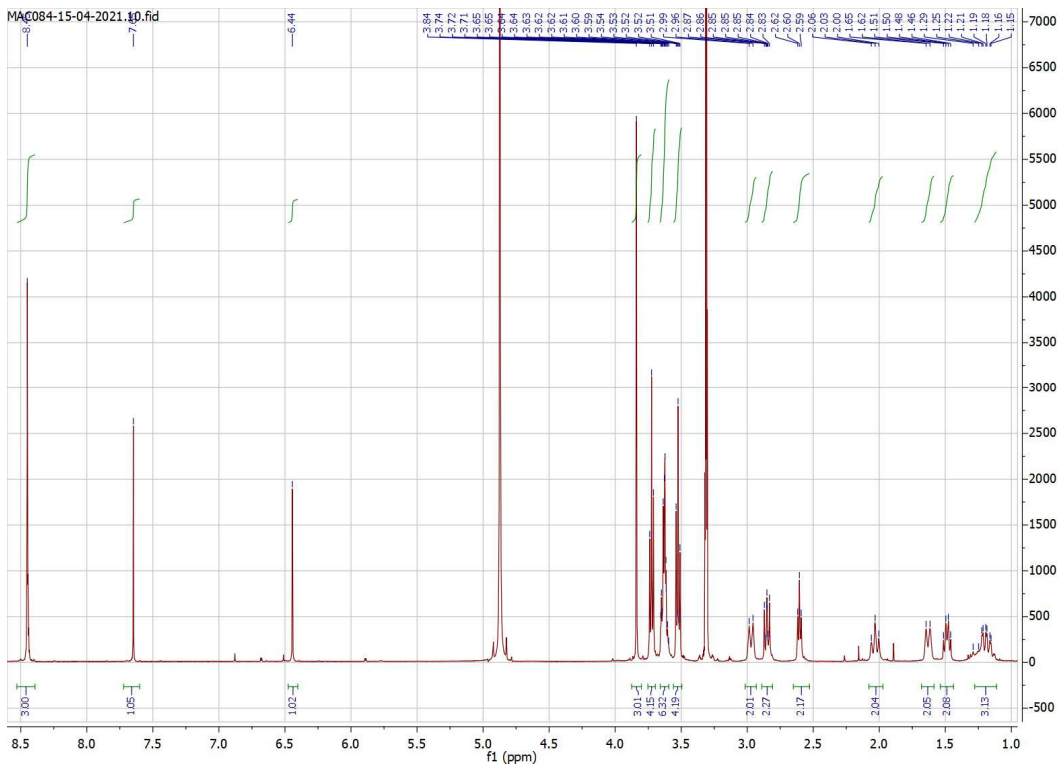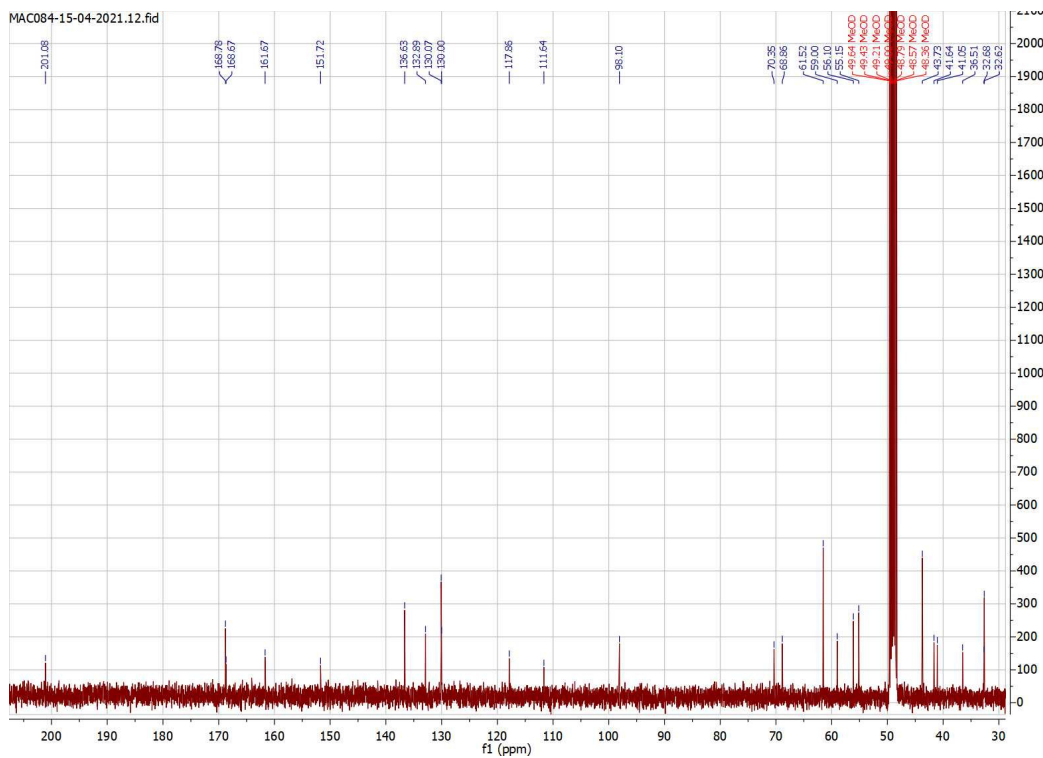

## Full images of Western blot of phosphorylation assay of NIH-3T3 TrkB cell line

In parallel with described compounds other derivatives (named compound) have been tested along the main one in the experiment.

In the main text, on the Figure 4., it is shown the part of the Western blot from the Image 2.

**Image 1.**

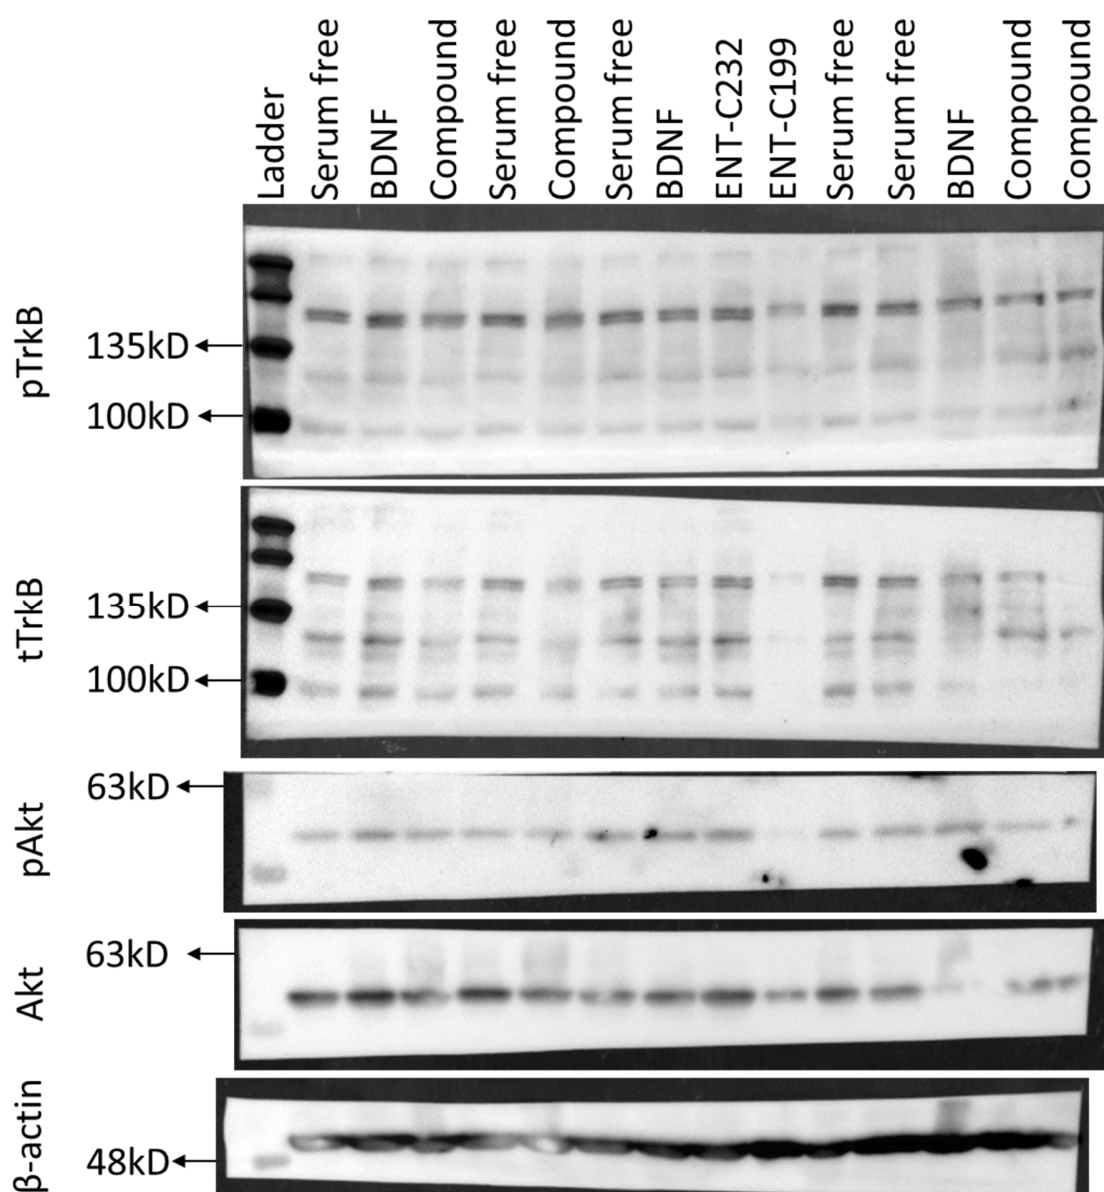

Image 2.

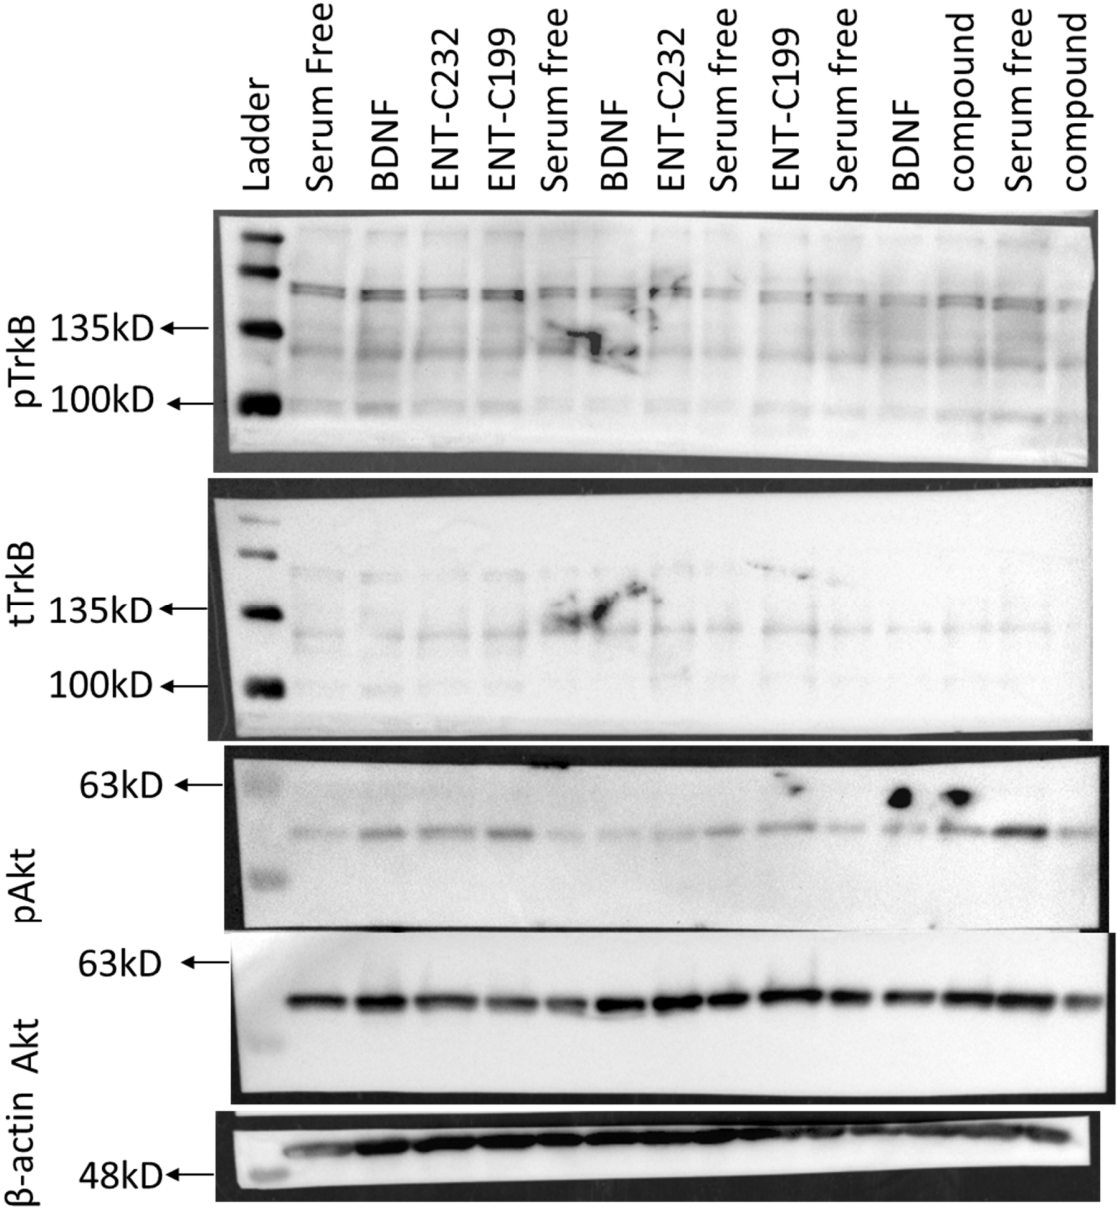

Image 3.

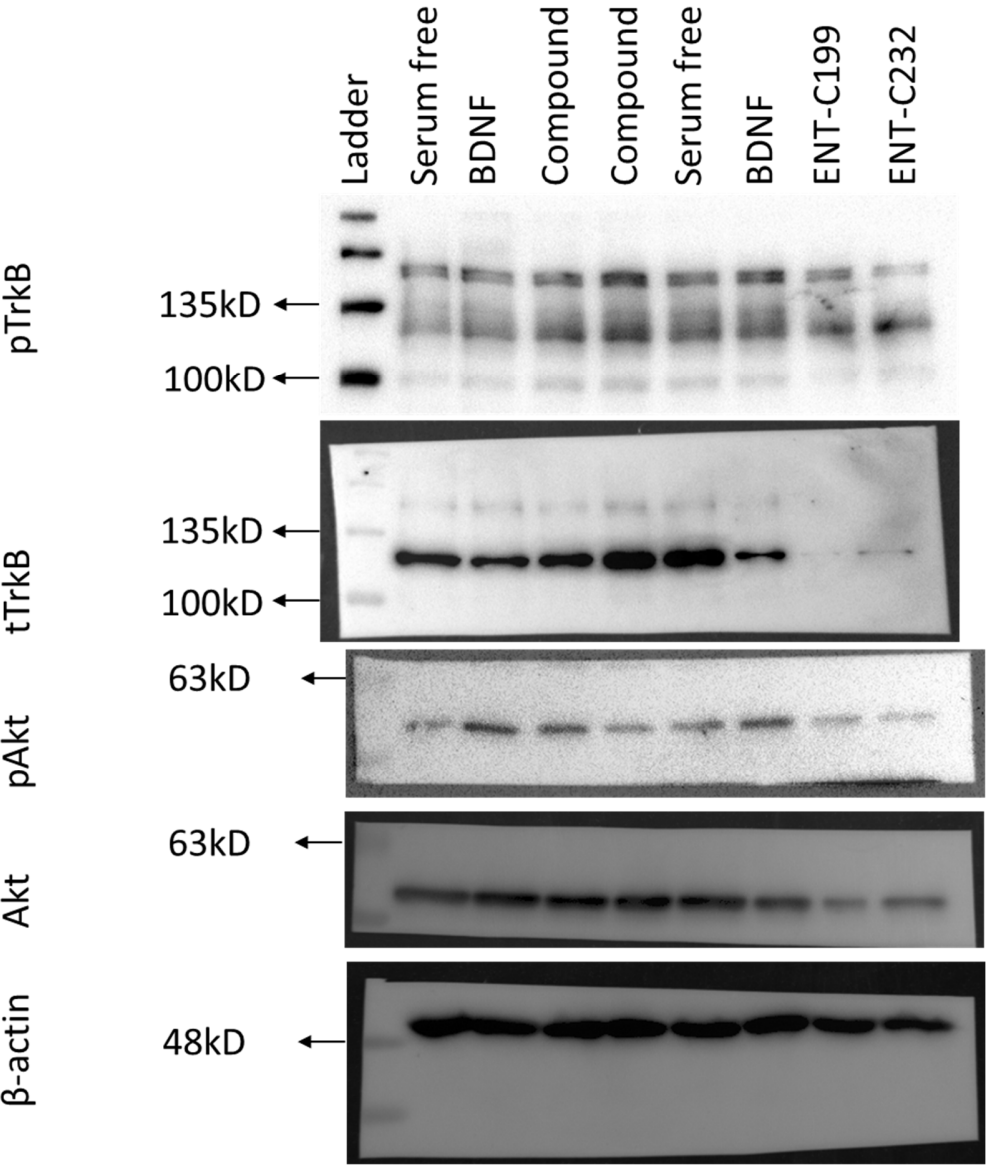

Image 4.

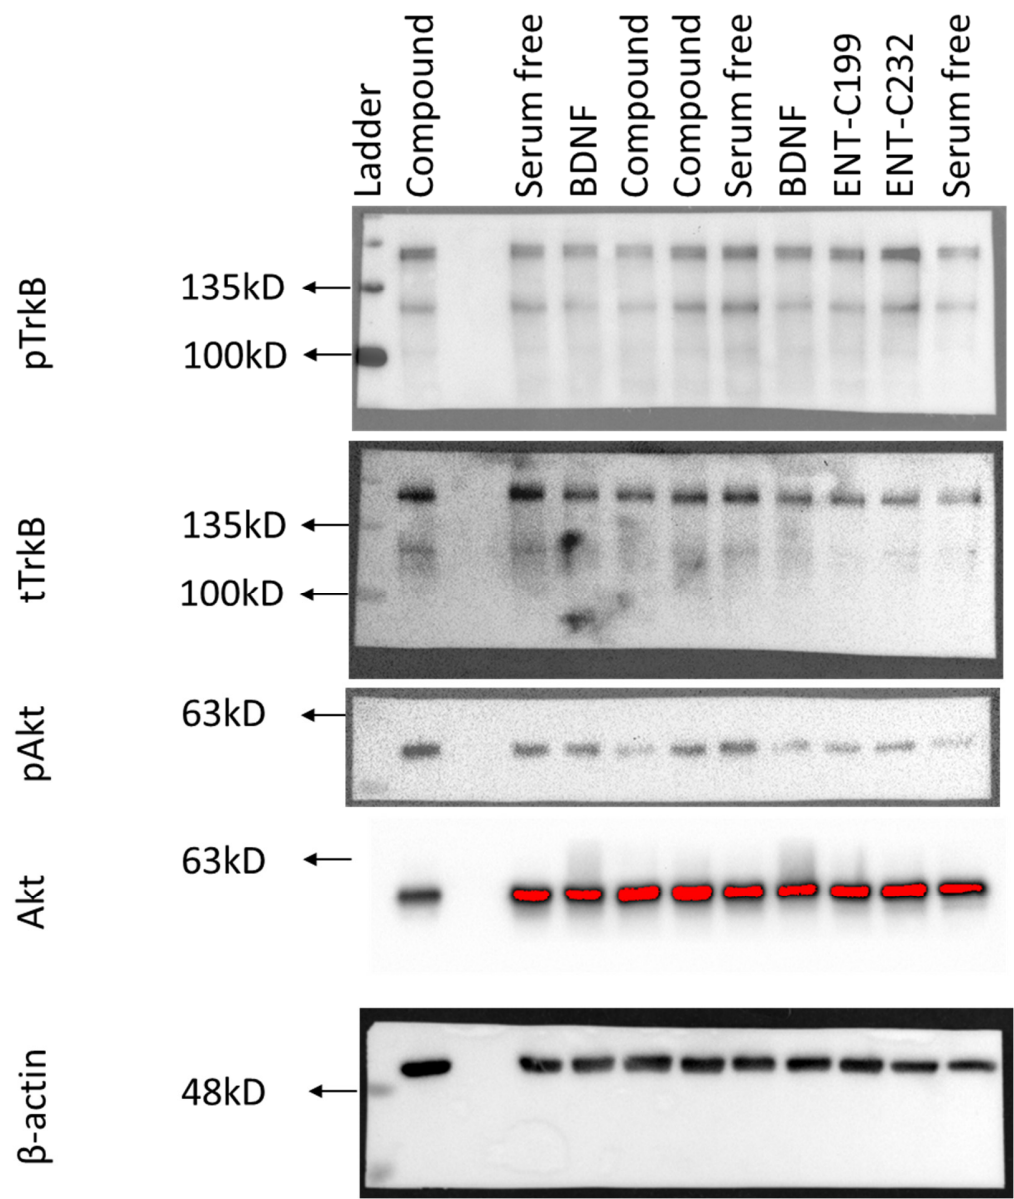

## Determination of cAMP production

### 5-HT

|             | EC50            | Log(EC50)   | Top AMPc    |
|-------------|-----------------|-------------|-------------|
| TC27        | 2.20E-09        | -8.7        | 100.00%     |
| TC14        | 4.33E-09        | -8.4        | 100.00%     |
| TC15        | 3.70E-09        | -8.4        | 100.00%     |
| <b>Moy.</b> | <b>3.41E-09</b> | <b>-8.5</b> | <b>100%</b> |
| <b>SEM</b>  | 6.33E-10        | 0.1         | 0.00%       |

### RS 67333

|             | EC50            | Log(EC50)   | Top AMPc   |
|-------------|-----------------|-------------|------------|
| TC27        | 7.86E-10        | -9.1        | 67.01%     |
| TC14        | 1.54E-09        | -8.8        | 60.01%     |
| TC15        | 2.93E-10        | -9.5        | 76.26%     |
| <b>Moy.</b> | <b>8.72E-10</b> | <b>-9.1</b> | <b>68%</b> |
| <b>SEM</b>  | 3.62E-10        | 0.2         | 4.71%      |

### ENT-C199

|             | EC50            | Log(EC50)   | Top AMPc   |
|-------------|-----------------|-------------|------------|
| TC27        | 1.25E-09        | -8.9        | 53.83%     |
| TC14        | 3.96E-10        | -9.4        | 46.75%     |
| TC15        | 8.71E-10        | -9.1        | 42.14%     |
| <b>Moy.</b> | <b>8.40E-10</b> | <b>-9.1</b> | <b>48%</b> |
| <b>SEM</b>  | 2.48E-10        | 0.1         | 3.40%      |

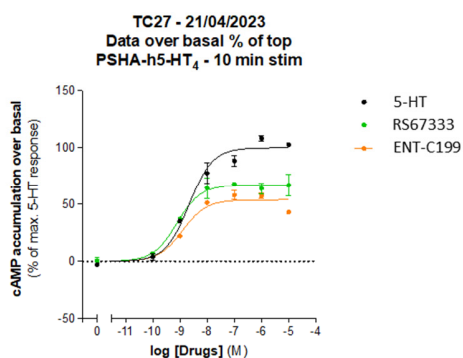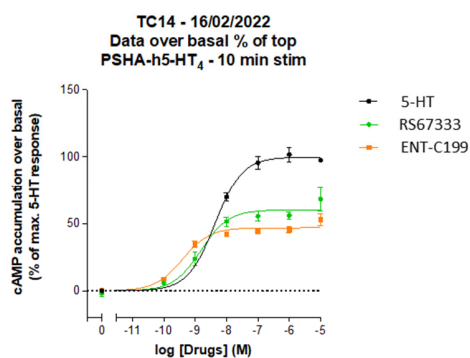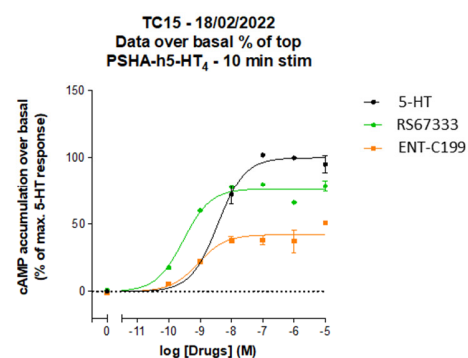

Supplement: s1 [file s1]
